# Supplementary material for: A Scoping Review of Radiation Oncology Educational and Career-Planning Interventions in Undergraduate Medical Education
Source: MDPI journal article supplement (doi:10.3390/curroncol28010072), 2021-01-31
Supplement: s1 [file s1]

**Table S1.** Summary of study outcomes grouped by intervention objective.

| Intervention objective           | Study                                               | Target populations and number of participants | Intervention type | Outcome collection and comparison                  | Outcome summary                                                                                                                                                                                                                                                                                                                                                                                                                                     |
|----------------------------------|-----------------------------------------------------|-----------------------------------------------|-------------------|----------------------------------------------------|-----------------------------------------------------------------------------------------------------------------------------------------------------------------------------------------------------------------------------------------------------------------------------------------------------------------------------------------------------------------------------------------------------------------------------------------------------|
| Radiation oncology (RO) teaching | Hirsch et al., 2007 (Oncology Education Initiative) | Clinical students <sup>†</sup> , 149          | Half-day course   | Survey, no comparison                              | Participants were surveyed about program satisfaction and interest in RO. 56% of students felt there was not adequate exposure to oncology in clinical clerkship. 84% said they had no exposure or knowledge of radiation therapy prior to the program, while 88% reported they were motivated to learn after participating. 90% were satisfied or very satisfied with the session. 32% subsequently elected to participate in further RO teaching. |
|                                  | Hirsch et al., 2008 (Oncology Education Initiative) | Clinical students, 153                        | Half-day course   | Examination, pre- and post-intervention            | Average test grade improved from 59% to 70% (p = 0.011).                                                                                                                                                                                                                                                                                                                                                                                            |
|                                  | Hirsch et al., 2012 (Oncology Education Initiative) | Clinical students, 155                        | Half-day course   | Examination, pre- and post-intervention            | Average test grade improved from 62% to 68.9% (p = 0.0001).                                                                                                                                                                                                                                                                                                                                                                                         |
|                                  | Zaorsky et al., 2012                                | Clinical students, 52                         | Clinical elective | Examination and survey, pre- and post-intervention | Participants were surveyed about program satisfaction. Average test grade improved from 64% to 82% (p < 0.001). Rating 1-9. Usefulness: 8.1, understanding of RO 8.8, recommendation of the rotation to their peers: 8.2.                                                                                                                                                                                                                           |

| Intervention objective | Study                                                | Target populations and number of participants | Intervention type            | Outcome collection and comparison                       | Outcome summary                                                                                                                                                                                                                                                                                                                                                                                                                                    |
|------------------------|------------------------------------------------------|-----------------------------------------------|------------------------------|---------------------------------------------------------|----------------------------------------------------------------------------------------------------------------------------------------------------------------------------------------------------------------------------------------------------------------------------------------------------------------------------------------------------------------------------------------------------------------------------------------------------|
|                        | Golden et al., 2014 (ROECSG)                         | Clinical students, 18                         | Half-day course              | Survey, no comparison                                   | Participants were surveyed about program satisfaction. Scale 1-5. Rated 5 in usefulness to understand RO as a specialty, to increase student comfort in specialty decision and to help students with their transition to a RO residency.                                                                                                                                                                                                           |
|                        | Agarwal et al., 2015 (Oncology Education Initiative) | Medical students, 169                         | Multi-day course             | Survey, comparison among participant groups             | Participants were surveyed about program satisfaction. Over 73% of students agreed or strongly agreed that the course met its learning objectives. Proportion of students who felt that the block was effective in preparing them to treat cancer patients in clerkship increased from 15.0% in 2010 to 45.8% in 2012. Women were more likely to view the course more positively ( $p = 0.0234$ ) and consider it more effective ( $p = 0.0303$ ). |
|                        | Golden et al., 2016 (ROECSG)                         | Clinical students, 88                         | Half-day course              | Survey, pre- and post-intervention (in a single survey) | Participants were surveyed about program satisfaction and interest in RO. 89.1% of students reported intent to pursue RO as a specialty. Scale 1-5. Understanding RO: 5, specialty decision comfort: 4, help transition to RO residency: 4. Comfort with specialty decision was significantly higher after completing program (4 vs 5, $p < 0.001$ ).                                                                                              |
|                        | Gunther et al., 2016                                 | Clinical students, 24                         | Half-day course (contouring) | Examination and survey, pre- and post-intervention      | Participants were surveyed about program satisfaction. Scale 1-5. Importance: 4, improved comfort with contouring: 1 (pre) vs 4 (post). Mean Dice similarity coefficient improved from 0.29 to 0.68 ( $p < 0.01$ ).                                                                                                                                                                                                                                |

| Intervention objective | Study                                                | Target populations and number of participants | Intervention type            | Outcome collection and comparison                                     | Outcome summary                                                                                                                                                                                                                                                                                                                                                                                                                                    |
|------------------------|------------------------------------------------------|-----------------------------------------------|------------------------------|-----------------------------------------------------------------------|----------------------------------------------------------------------------------------------------------------------------------------------------------------------------------------------------------------------------------------------------------------------------------------------------------------------------------------------------------------------------------------------------------------------------------------------------|
|                        | Oskvarek et al., 2017 (ROECSG)                       | Clinical students, 109                        | Half-day course              | Survey, comparison between participants and non-participants          | Participants were surveyed about program satisfaction and interest in RO. Scale 1-5. Compared to radiation oncology applicants in non-curriculum sites, students in curriculum sites had greater confidence in radiation treatment decisions (4 vs 3, $p < 0.05$ ), knowledge of radiation biology (3 vs 2, $p < 0.01$ ), knowledge of radiation set-up (3 vs 2, $p < 0.05$ ) and knowledge of radiation treatment planning (3 vs 2, $p < 0.01$ ). |
|                        | Agarwal et al., 2018 (Oncology Education Initiative) | Clinical students, 495                        | Half-day course              | Examination, pre- and post-intervention                               | Average test grade improved from 62% to 69.6% ( $p < 0.001$ ).                                                                                                                                                                                                                                                                                                                                                                                     |
|                        | Neppala et al., 2018                                 | Pre-clinical students <sup>¶</sup> , 43       | Half-day course (contouring) | Examination and survey, pre- and post-intervention and between groups | Participants were surveyed about program satisfaction and interest in RO. Overall knowledge improved on the immediate post-test (87% vs 79%, $p = 0.007$ ). There were no significant differences between the didactic lecture and the contouring group. Scale 1-5. The contouring group had greater engagement (3.76 vs 3.10, $p = 0.02$ ), interest in completing a future clinical RO rotation (3.27 vs 2.2, $p = 0.01$ ).                      |

| Intervention objective    | Study                         | Target populations and number of participants | Intervention type | Outcome collection and comparison                          | Outcome summary                                                                                                                                                                                                                                                                                                                                                                                                                                                                 |
|---------------------------|-------------------------------|-----------------------------------------------|-------------------|------------------------------------------------------------|---------------------------------------------------------------------------------------------------------------------------------------------------------------------------------------------------------------------------------------------------------------------------------------------------------------------------------------------------------------------------------------------------------------------------------------------------------------------------------|
| General oncology teaching | Golden et al., 2018 (ROECSSG) | Clinical students, 146                        | Half-day course   | Examination, pre- and post-intervention and between groups | Average test grade improved from 63.9% to 80.2% ( $p < 0.01$ ). Compared to those who completed a non-ROECSSG clerkship, those who completed ROECSSG clerkship had higher scores (77.3% vs 68.8%, $p = 0.01$ ).                                                                                                                                                                                                                                                                 |
|                           | Finlay, 2001                  | Pre-clinical students, 45                     | Half-day course   | Survey, no comparison                                      | Participants were surveyed about knowledge and program satisfaction. Most (88%) returned positive comments on didactic lectures. The majority indicated a change in attitude after attending the session. Narrative comments were mostly related to increased awareness (65%) and empathy (30%).                                                                                                                                                                                |
|                           | Mann et al., 2009             | Clinical students, 186                        | Half-day course   | Survey, no comparison                                      | Participants were surveyed about program satisfaction. Scale 1-5. Average satisfaction: 3.85. Most valued session: role playing.                                                                                                                                                                                                                                                                                                                                                |
|                           | Tsui et al., 2019             | Pre-clinical students, 323                    | Shadowing         | Survey, comparison among participant groups                | Participants were surveyed about program satisfaction and interest in RO. 48% of students had greater appreciation for the multidisciplinary nature of oncology, 48% felt more competent interacting with oncologists, and 21% felt more competent with patients after attending session. Students were more likely to be interested in pursuing oncology with voluntary participation ( $p = 0.02$ ). Involvement of faculty member was more favourably viewed ( $p = 0.02$ ). |

| Intervention objective | Study                 | Target populations and number of participants | Intervention type           | Outcome collection and comparison                                                   | Outcome summary                                                                                                                                                                                                                                                                                                                                                                                                                                       |
|------------------------|-----------------------|-----------------------------------------------|-----------------------------|-------------------------------------------------------------------------------------|-------------------------------------------------------------------------------------------------------------------------------------------------------------------------------------------------------------------------------------------------------------------------------------------------------------------------------------------------------------------------------------------------------------------------------------------------------|
|                        | Fukuchi et al., 2000  | Clinical students, 16                         | Game                        | Examination and survey, pre- and post-intervention                                  | Participants were examined before and after the intervention, and surveyed about program satisfaction. Significant linear relationship between number of questions answered correctly and number of games played ( $R = 0.526$ , $p < 0.001$ ). Post-game surveys were positive for appreciation of multidisciplinary nature of cancer management, knowledge of malignancies and understanding of oncologic principles (scale 1-5; 4.56, 4.50, 4.56). |
|                        | McKillip et al., 2017 | Pre-clinical students, 33                     | Summer program <sup>s</sup> | Survey, pre- and post-intervention                                                  | Participants were surveyed about program satisfaction and interest in RO. Scale 1-5. Understanding of clinical oncology: 4 vs 2, $p < 0.01$ . Understanding of research oncology: 4 vs 2, $p < 0.01$ . Participants were more likely to talk about oncology as a continuum of care, includes survivorship, and screening/prevention in their post-program assessments.                                                                                |
| Career planning        | Barrett et al., 2008  | Pre-clinical students, 105                    | Clinical elective           | Retrospective data collection, comparison between participants and non-participants | Data were collected on students' interests in RO. 4.12% of program participants between 1971-1981 became radiation oncologists, compared to 0.7% of all post-MD trainees in 1989 ( $p = 0.0091$ ).                                                                                                                                                                                                                                                    |

| Intervention objective | Study               | Target populations and number of participants | Intervention type | Outcome collection and comparison                                  | Outcome summary                                                                                                                                                                                                                                                                                                                  |
|------------------------|---------------------|-----------------------------------------------|-------------------|--------------------------------------------------------------------|----------------------------------------------------------------------------------------------------------------------------------------------------------------------------------------------------------------------------------------------------------------------------------------------------------------------------------|
|                        | Tamaki et al., 2013 | Medical students and residents, 531           | Half-day course   | Retrospective data collection, comparison among participant groups | An increasing proportion of program participants were members of the Japanese Society for Radiation Oncology (from 17.5% in 2004 to 26.4% in 2012).                                                                                                                                                                              |
|                        | Haupt et al., 2020  | Pre-clinical students, 37                     | Clinical elective | Survey, pre- and post-intervention                                 | Participants were surveyed about interest in RO. Post-program, a greater proportion of participants listed RO as a top 3 career choice (25.0% vs 13.8%, $p = 0.2396$ ). The majority (64.8%) of participants stated their interest in RO increased after the program.                                                            |
|                        | Kang et al., 2020   | Pre-clinical students, 31                     | Summer program    | Survey, pre- and post-intervention (in a single survey)            | Participants were surveyed about program satisfaction and interest in RO. Scale 1-5. Overall educational value: 4.8. Post-program, most students (76%) reported an increased interest in oncology. Average proportion of students who entered a RO career was 30.5%, compared to 0.7% in national residency matching statistics. |
| Basic science teaching | Oertel et al., 2019 | Pre-clinical students, 682                    | Multi-day course  | Survey, no comparison                                              | Participants were surveyed about program satisfaction. Scale: 0-100 (0 being the best). Anatomy and Imaging: 9.3-15.4. Seminars, practical training, other faculty courses: 22.3-33.3.                                                                                                                                           |

| Intervention objective | Study                                               | Target populations and number of participants | Intervention type  | Outcome collection and comparison                                                   | Outcome summary                                                                                                                                                                                                                                                                                                                                                                                                |
|------------------------|-----------------------------------------------------|-----------------------------------------------|--------------------|-------------------------------------------------------------------------------------|----------------------------------------------------------------------------------------------------------------------------------------------------------------------------------------------------------------------------------------------------------------------------------------------------------------------------------------------------------------------------------------------------------------|
|                        | Zumwalt et al., 2007                                | Trainees and staff                            | Multi-day course   | Survey, comparison among participant groups                                         | Participants were surveyed about program satisfaction. Scale 1-10. Overall interest: 9.5-10. Quality: 9.5-10. Amount of new knowledge: 8.6-9.6. Faculty ranked relevance of the class to their work lower than medical students/residents (8.6 vs 9.8).                                                                                                                                                        |
| Mentorship             | Boyd et al., 2019                                   | Medical students, 76                          | Mentorship program | Survey, no comparison                                                               | Participants were surveyed about program satisfaction and interest in RO. 77.3% of participants reported the program strongly affected their career choice. 77.3% of participants reported their research experience strongly or moderately affected their career choice. 100% found that the program was effective or very effective. 81.8% reported that mentorship was extremely important to their career. |
|                        | Hirsch et al., 2014 (Oncology Education Initiative) | Medical students, 22                          | Mentorship program | Retrospective data collection, comparison between participants and non-participants | Data were collected about participants' interest in RO. Mentorship grew from 3 students in 2004 to 11 in 2013. Research productivity grew from 3 publications in 2007 to 14 in 2013. 29.3% of participants applied to RO residency and 100% matched (compared to a match rate of 85.1% nationally).                                                                                                            |

Abbreviations: RO = Radiation Oncology. ROECSCG = Radiation Oncology Education Collaborative Study Group.

‡Clinical students are medical students in their third and fourth years.

¶Pre-clinical students are medical students in their first and second years.

§Summer programs can include a mix of didactic teaching, clinical work, mentorship, and/or research.
